# Supplementary material for: Genome-partitioning strategy, plastid and nuclear phylogenomic discordance, and its evolutionary implications of Clematis (Ranunculaceae)
Source: Front Plant Sci. 2022 Nov 14;13:1059379. doi: 10.3389/fpls.2022.1059379 (PMC9703796; doi:10.3389/fpls.2022.1059379)
Supplement: Supplementary Table S2 — Sample information of transcriptome data in this study. [file Table_2.xlsx]

## Sheet: Sheet1
Supplementary Table S2 Sample information of transcriptome data in this study.
Species	Sample locality	Voucher	SRA number	Number of reads	Size of data (Gbp)	Q20 (%)	Q30 (%)	BUSCO completeness(%)	Number of transcript sequences	Number of sequences remained after removing redundancy	N50 length (bp)
Anemoclema glaucifolium	Jianchuan, Yunnan, China	L. Xie 20190716-05	SRR14864508	43508852	6.1	0.973	0.93	0.639	89382	55905	1536
Clematis armandii	Gulin, Sichuan, China	2018040606	SRR16891801	41757276	5.82	0.984	0.951	0.658	63501	42983	1481
Clematis aureolata	Ko Chang, Thailand	LRD16	SRR16891760	46980106	6.54	0.977	0.937	0.756	91030	60298	1449
Clematis brevicaudata	Sizuolou, Beijing, China	SZL-b	SRR16891782	43050222	5.95	0.98	0.944	0.708	73781	48349	1441
Clematis crassifolia	Hechi, Guangxi, China	2017112105	SRR16891804	44701750	6.23	0.982	0.948	0.719	80685	58234	1336
Clematis fruticosa	Datong, Shanxi, China	20170064	SRR16891753	46269796	6.42	0.973	0.93	0.631	122046	86373	938
Clematis fusca	Qinglong, Hebei, China	LRD18	SRR16891757	40736072	5.66	0.981	0.946	0.618	61226	41567	1468
Clematis glauca	Liancheng, Gansu, China	2018072234	SRR16891807	42782124	5.97	0.983	0.951	0.671	87094	58163	1336
Clematis gouriana	Jiangyou, Sichuan, China	LRD8	SRR16891772	41476426	5.71	0.978	0.943	0.68	74761	51576	1340
Clematis gratopsis	Liancheng, Gansu, China	2018072237	SRR16891798	41549618	5.8	0.982	0.95	0.691	64065	44662	1470
Clematis heracleifolia	Sanyang ancient volcano, Beijing, China	SYG-h	SRR12459670	41327306	5.77	0.983	0.952	0.662	95037	63231	1263
Clematis huchouensis	Cult. in Chengdu, Sichuan, China	LRD9	SRR16891771	43623098	6.01	0.979	0.945	0.676	126486	90962	968
Clematis lasiandra	Gulin, Sichuan, China	LRD11	SRR16891770	42323786	5.84	0.977	0.942	0.688	89257	64626	1197
Clematis leschenaultiana	Hechi, Guangxi, China	2017112107	SRR14864487	41251114	5.75	0.983	0.951	0.623	80334	57713	1280
Clematis loureiriana	Lingyun, Guangxi, China	LRD4	SRR16891774	41971254	5.81	0.978	0.944	0.643	112758	81162	977
Clematis macropetala	Mentougou, Beijing, China	LRD20	SRR16891756	44903872	6.24	0.983	0.951	0.657	147758	114171	712
Clematis montana	Shangri-la, Yunnan, China	2019071601	SRR14864506	48052482	6.7	0.981	0.948	0.653	115025	79114	1115
Clematis otophora	Shennongjia, Hubei, China	20191122-01	SRR16891761	46967866	6.53	0.975	0.934	0.639	66726	46829	1375
Clematis peterae	Emeishan, Sichuan, China	LRD13	SRR16891768	42387906	5.85	0.98	0.945	0.696	86405	55482	1382
Clematis rehderiana	Derong, Sichuan, China	2019072003	SRR16891799	46112824	6.43	0.985	0.955	0.713	69724	49988	1393
Clematis repens	Emeishan, Sichuan, China	2018041104	SRR16891802	45778790	6.38	0.985	0.954	0.641	88997	62652	1224
Clematis reticulata	Gainsville, Florida, US	LRD21	SRR16891754	43358574	6.03	0.981	0.947	0.542	103862	69796	1025
Clematis sibirica	Zhangjiakou, Hebei, China	L. Xie 2019051801	SRR16891776	48954924	6.76	0.982	0.949	0.635	69561	46939	1367
Clematis songorica	Kashi, Xinjiang, China	HJKS2019082402	SRR16891788	43386930	6.04	0.974	0.93	0.692	57669	38406	1547
Clematis terniflora	Renheping, Hubei, China	20191120-02	SRR16891762	46688888	6.49	0.976	0.936	0.759	93984	64077	1313
Clematis tibetana	Gyirong, Xizang, China	XH087	SRR16891808	39333632	5.48	0.985	0.956	0.676	53429	37188	1543
Clematis tubulosa	Badaling, Beijing, China	SZL-t	SRR16891783	45021768	6.24	0.98	0.944	0.64	91447	57243	1264
Clematis viridis	Jomda, Xizang, China	HJJD2018070607	SRR16891785	38816844	5.41	0.974	0.93	0.608	56240	38751	1489
